# Supplementary material for: Predictive Capacity of Risk Models in Liver Transplantation
Source: PubMed Central journal article supplement — Transplant Direct. 2019 May 22;5(6):e457. doi: 10.1097/TXD.0000000000000896 (PMC6553625; doi:10.1097/txd.0000000000000896), 2019-05-22
Supplement: txd-5-e457-s001.pdf [file txd-5-e457-s001.pdf]

**Fig S1A. Patient survival, DRI**

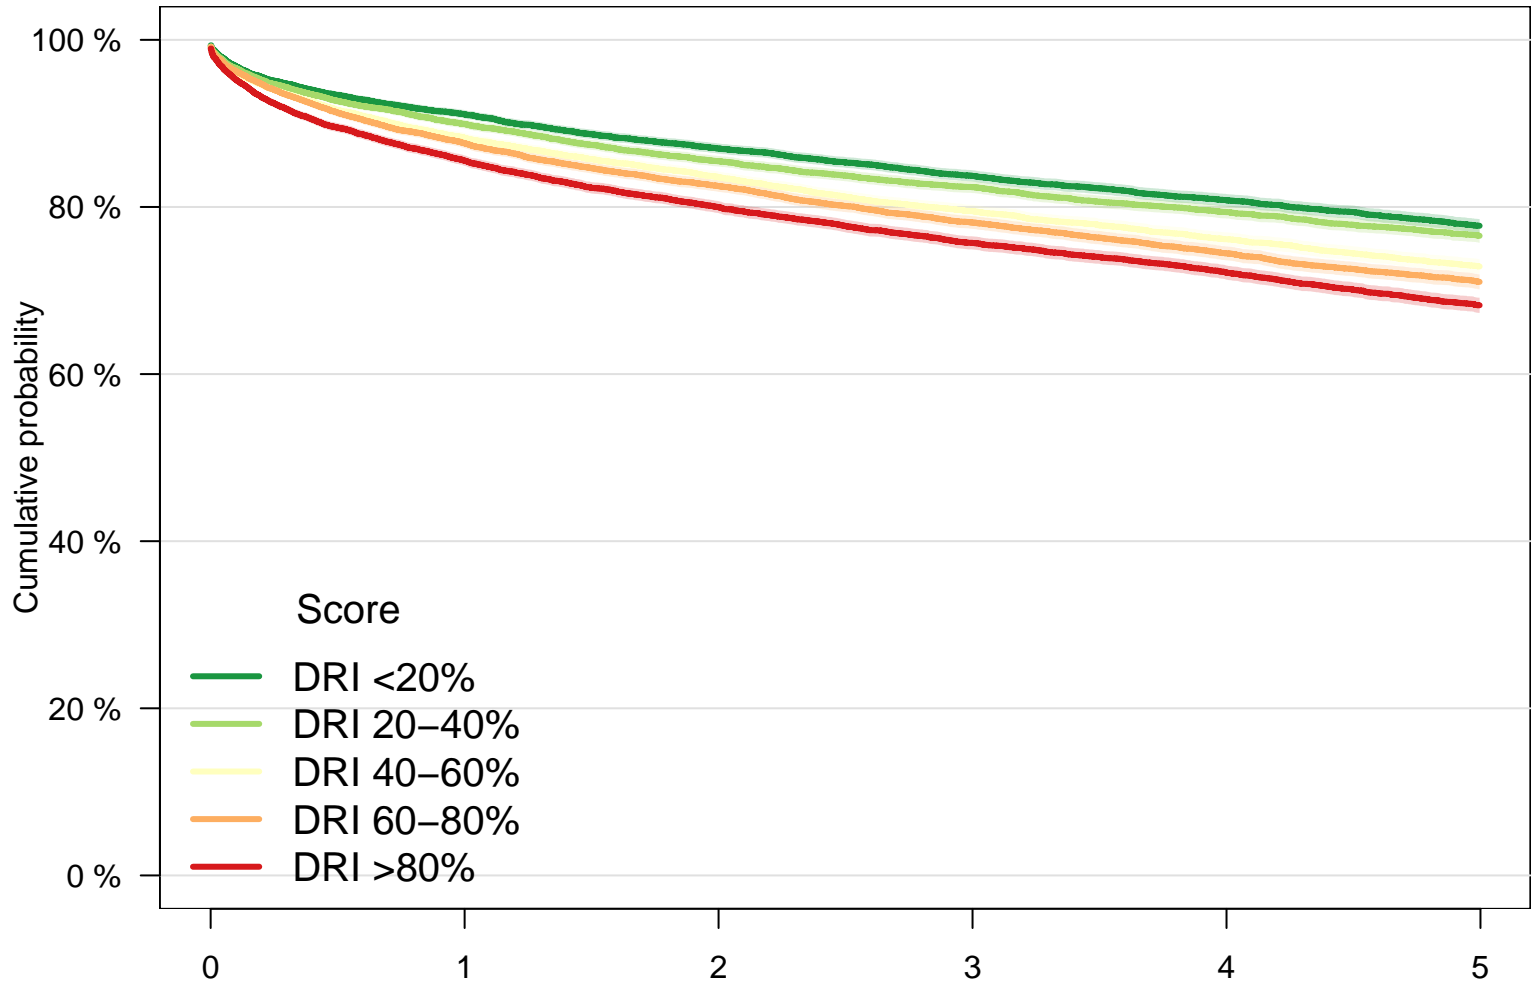

Survival period (years)

| Score       | 0     | 1     | 2    | 3    | 4    | 5    |
|-------------|-------|-------|------|------|------|------|
| DRI <20%:   | 12456 | 10759 | 9153 | 7788 | 6541 | 5432 |
| DRI 20–40%: | 12463 | 10497 | 8711 | 7343 | 6132 | 5085 |
| DRI 40–60%: | 12470 | 10392 | 8606 | 7131 | 5895 | 4839 |
| DRI 60–80%: | 12447 | 10320 | 8501 | 7019 | 5788 | 4801 |
| DRI >80%:   | 12458 | 10157 | 8403 | 6991 | 5875 | 4841 |

**Fig S1B. Patient survival, sRRI**

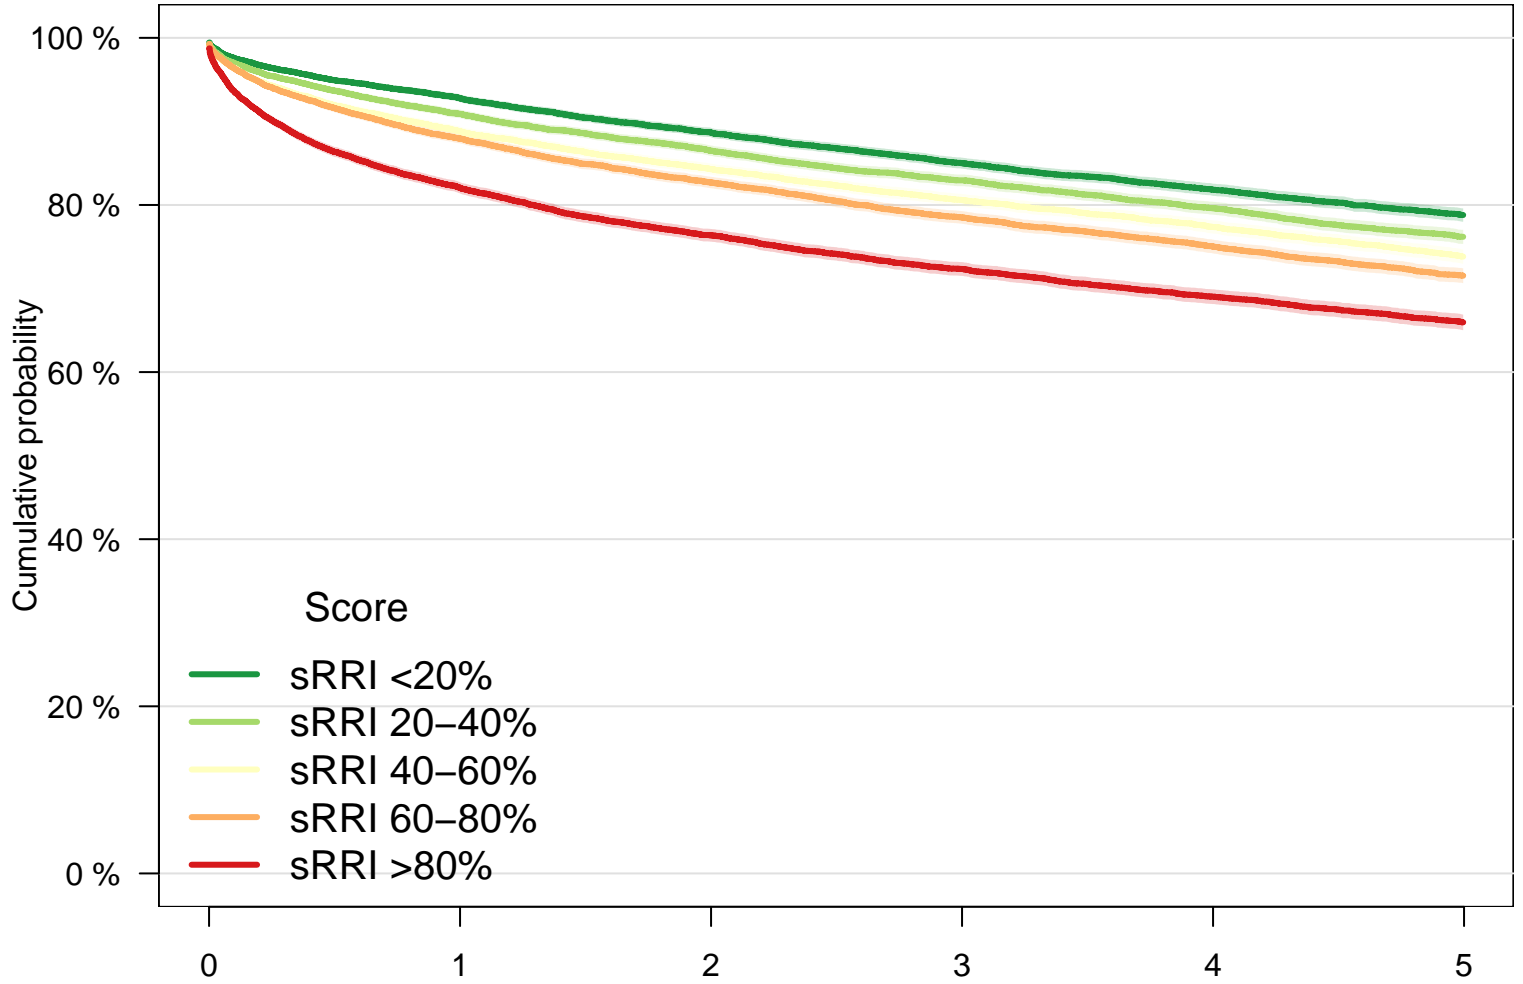

| Score        | Survival period (years) |       |      |      |      |      |
|--------------|-------------------------|-------|------|------|------|------|
| sRRI <20%:   | 12480                   | 11006 | 9470 | 8097 | 6849 | 5736 |
| sRRI 20-40%: | 12362                   | 10601 | 8848 | 7435 | 6256 | 5219 |
| sRRI 40-60%: | 12555                   | 10554 | 8810 | 7451 | 6225 | 5146 |
| sRRI 60-80%: | 12395                   | 10329 | 8574 | 7146 | 5928 | 4876 |
| sRRI >80%:   | 12502                   | 9635  | 7672 | 6143 | 4973 | 4021 |

**Fig S1C. Patient survival, ETDRI**

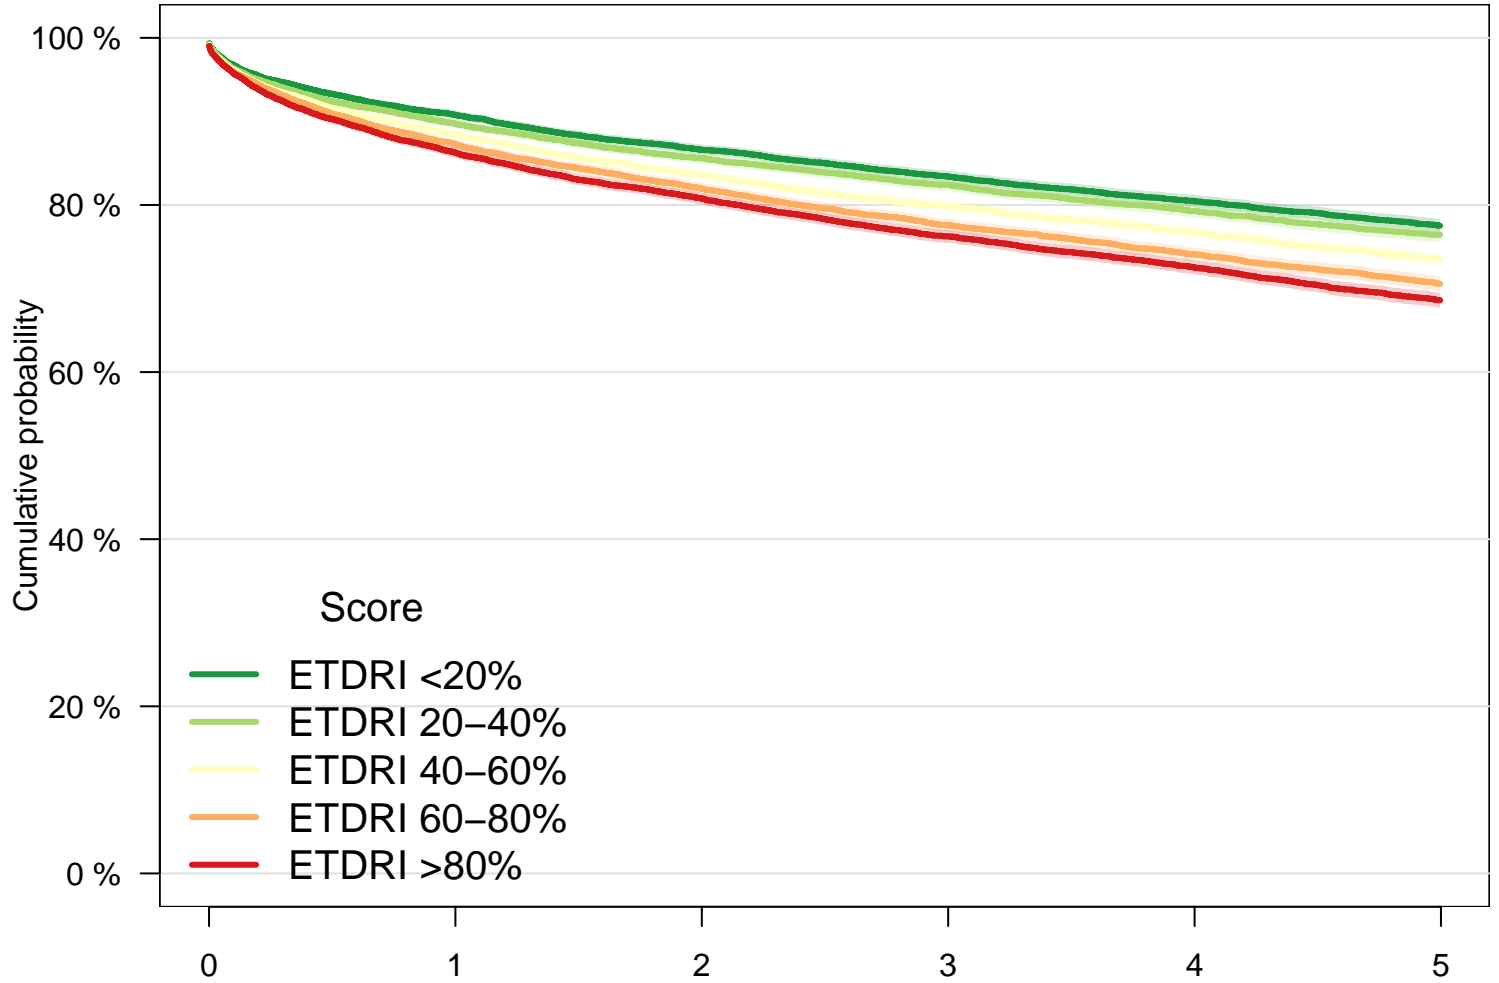

| Score         | Survival period (years) |       |      |      |      |      |
|---------------|-------------------------|-------|------|------|------|------|
| ETDRI <20%:   | 12457                   | 10744 | 9181 | 7842 | 6637 | 5529 |
| ETDRI 20–40%: | 12465                   | 10390 | 8469 | 6971 | 5740 | 4724 |
| ETDRI 40–60%: | 12450                   | 10424 | 8694 | 7335 | 6144 | 5100 |
| ETDRI 60–80%: | 12485                   | 10342 | 8533 | 7087 | 5810 | 4774 |
| ETDRI >80%:   | 12437                   | 10225 | 8497 | 7037 | 5900 | 4871 |

**Fig S1D. Patient survival, SOFT**

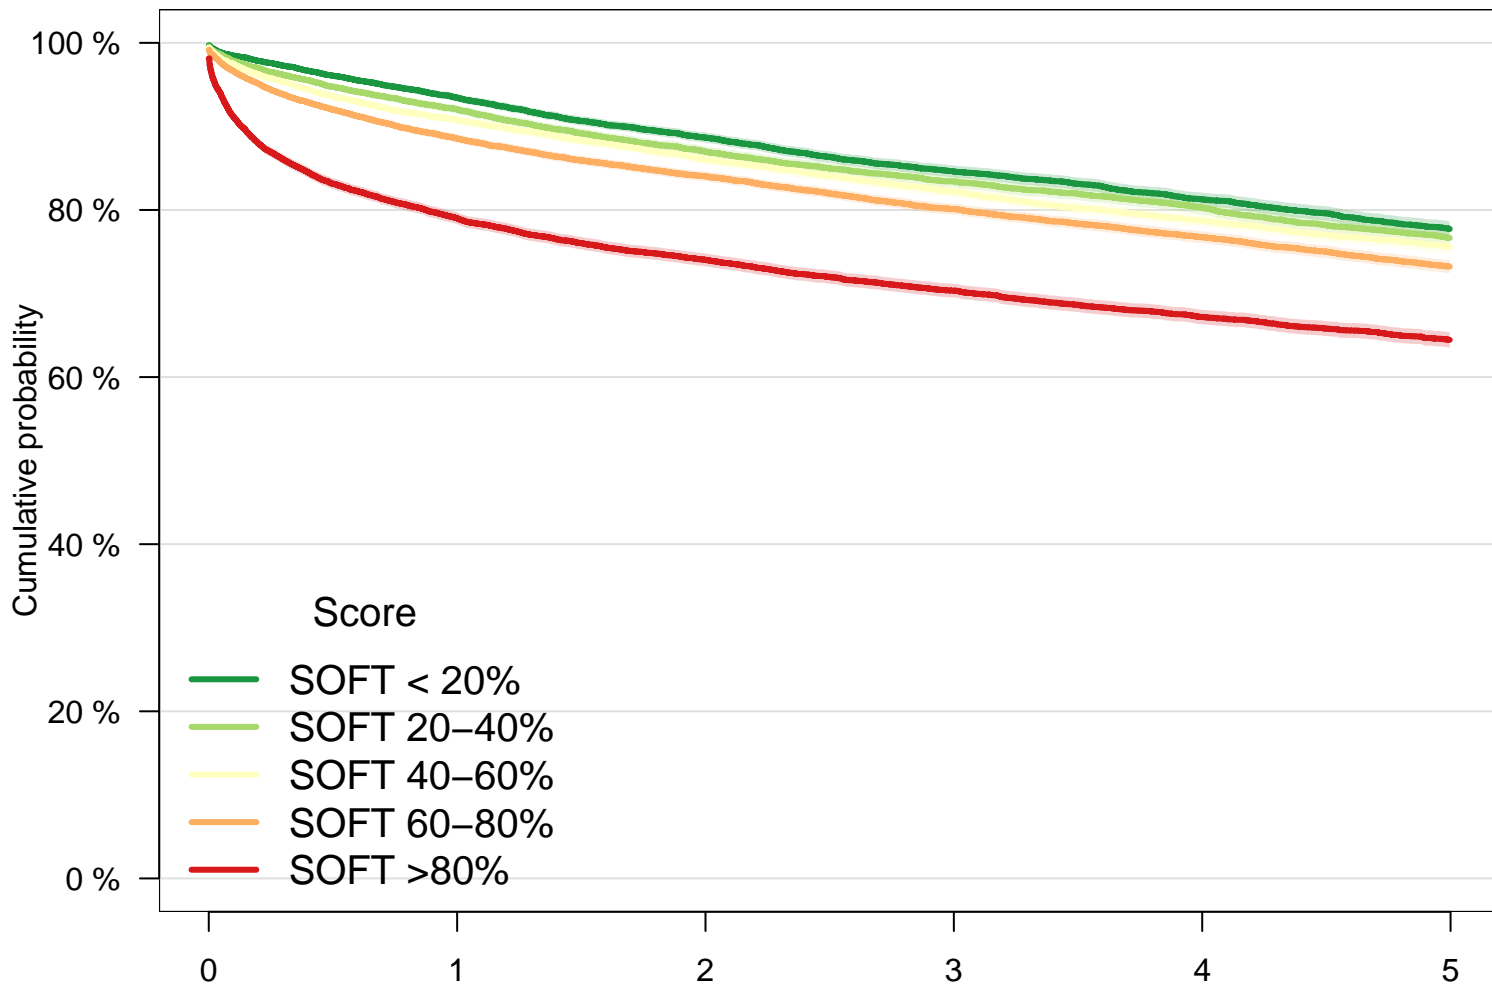

| Score        | Survival period (years) |       |       |      |      |      |
|--------------|-------------------------|-------|-------|------|------|------|
| SOFT < 20%:  | 11149                   | 9735  | 7994  | 6596 | 5346 | 4297 |
| SOFT 20-40%: | 11378                   | 9919  | 8346  | 7083 | 6000 | 4958 |
| SOFT 40-60%: | 11386                   | 9851  | 8288  | 7059 | 5922 | 4987 |
| SOFT 60-80%: | 15496                   | 13049 | 11004 | 9251 | 7771 | 6468 |
| SOFT >80%:   | 12885                   | 9571  | 7742  | 6283 | 5192 | 4288 |

**Fig S1E. Patient survival, BAR**

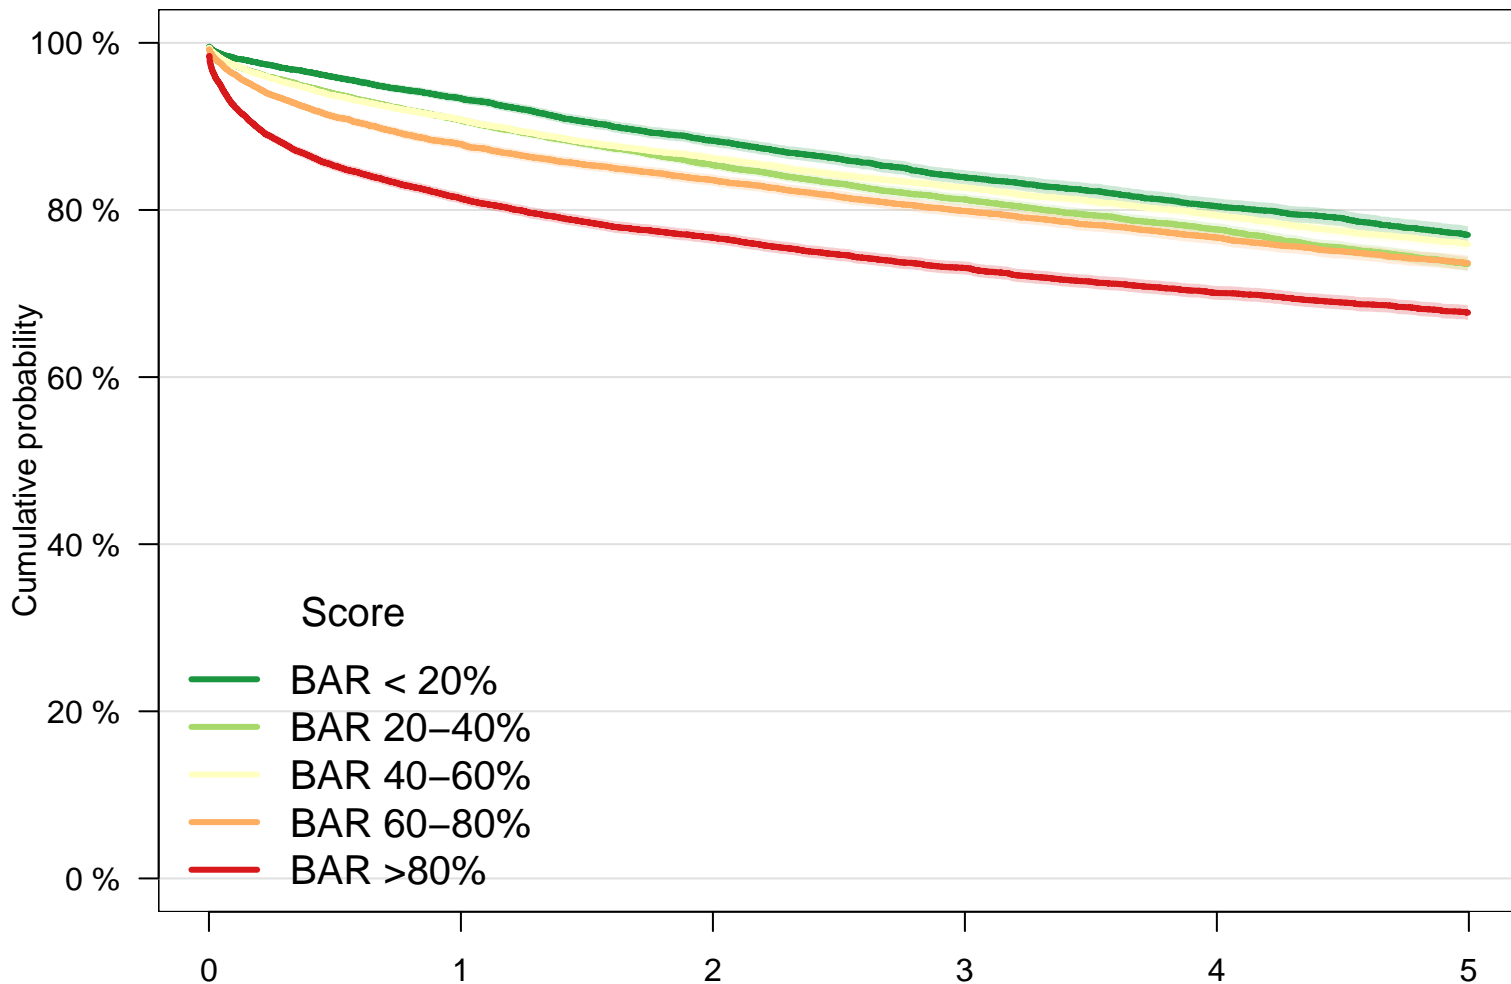

| Score       | Survival period (years) |       |       |      |      |      |
|-------------|-------------------------|-------|-------|------|------|------|
| BAR < 20%:  | 7999                    | 7072  | 5937  | 5001 | 4191 | 3461 |
| BAR 20–40%: | 14410                   | 12311 | 10136 | 8430 | 6997 | 5711 |
| BAR 40–60%: | 14586                   | 12652 | 10806 | 9344 | 7948 | 6748 |
| BAR 60–80%: | 11622                   | 9681  | 8174  | 6826 | 5688 | 4648 |
| BAR >80%:   | 13677                   | 10409 | 8321  | 6671 | 5407 | 4430 |

**Fig S1F. Patient survival, DMELD**

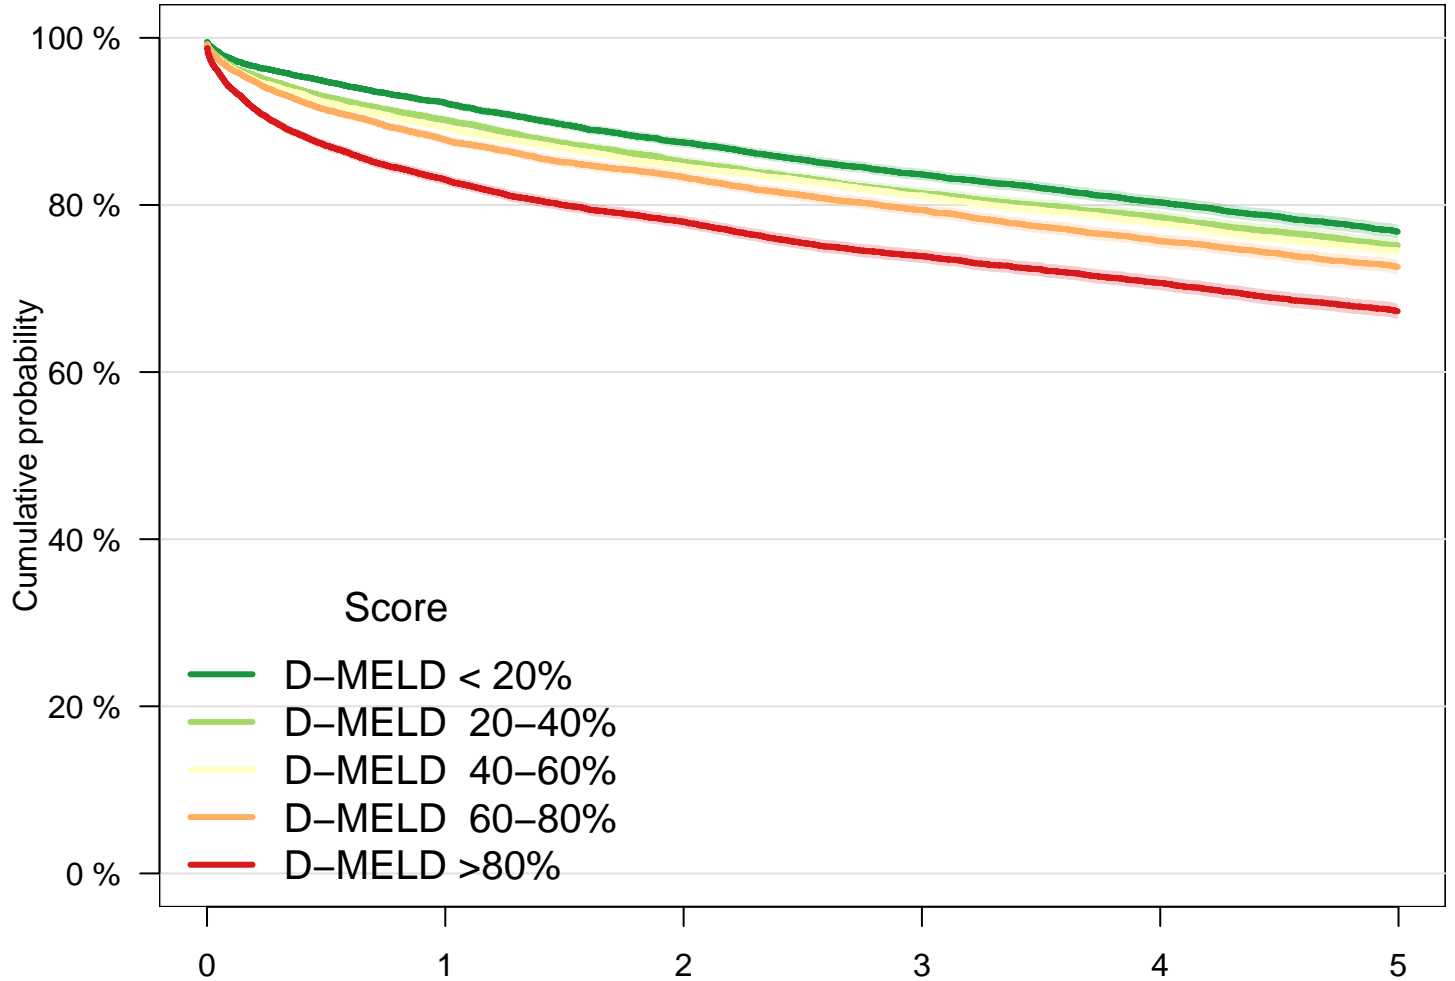

| Score          | Survival period (years) |       |      |      |      |      |
|----------------|-------------------------|-------|------|------|------|------|
| D-MELD < 20%:  | 12333                   | 10716 | 8957 | 7531 | 6308 | 5225 |
| D-MELD 20–40%: | 12575                   | 10734 | 9008 | 7694 | 6462 | 5357 |
| D-MELD 40–60%: | 12458                   | 10526 | 8785 | 7375 | 6187 | 5164 |
| D-MELD 60–80%: | 12438                   | 10349 | 8659 | 7218 | 6009 | 4992 |
| D-MELD >80%:   | 12490                   | 9800  | 7965 | 6454 | 5265 | 4260 |

**Fig S2A. Overall graft survival, DRI**

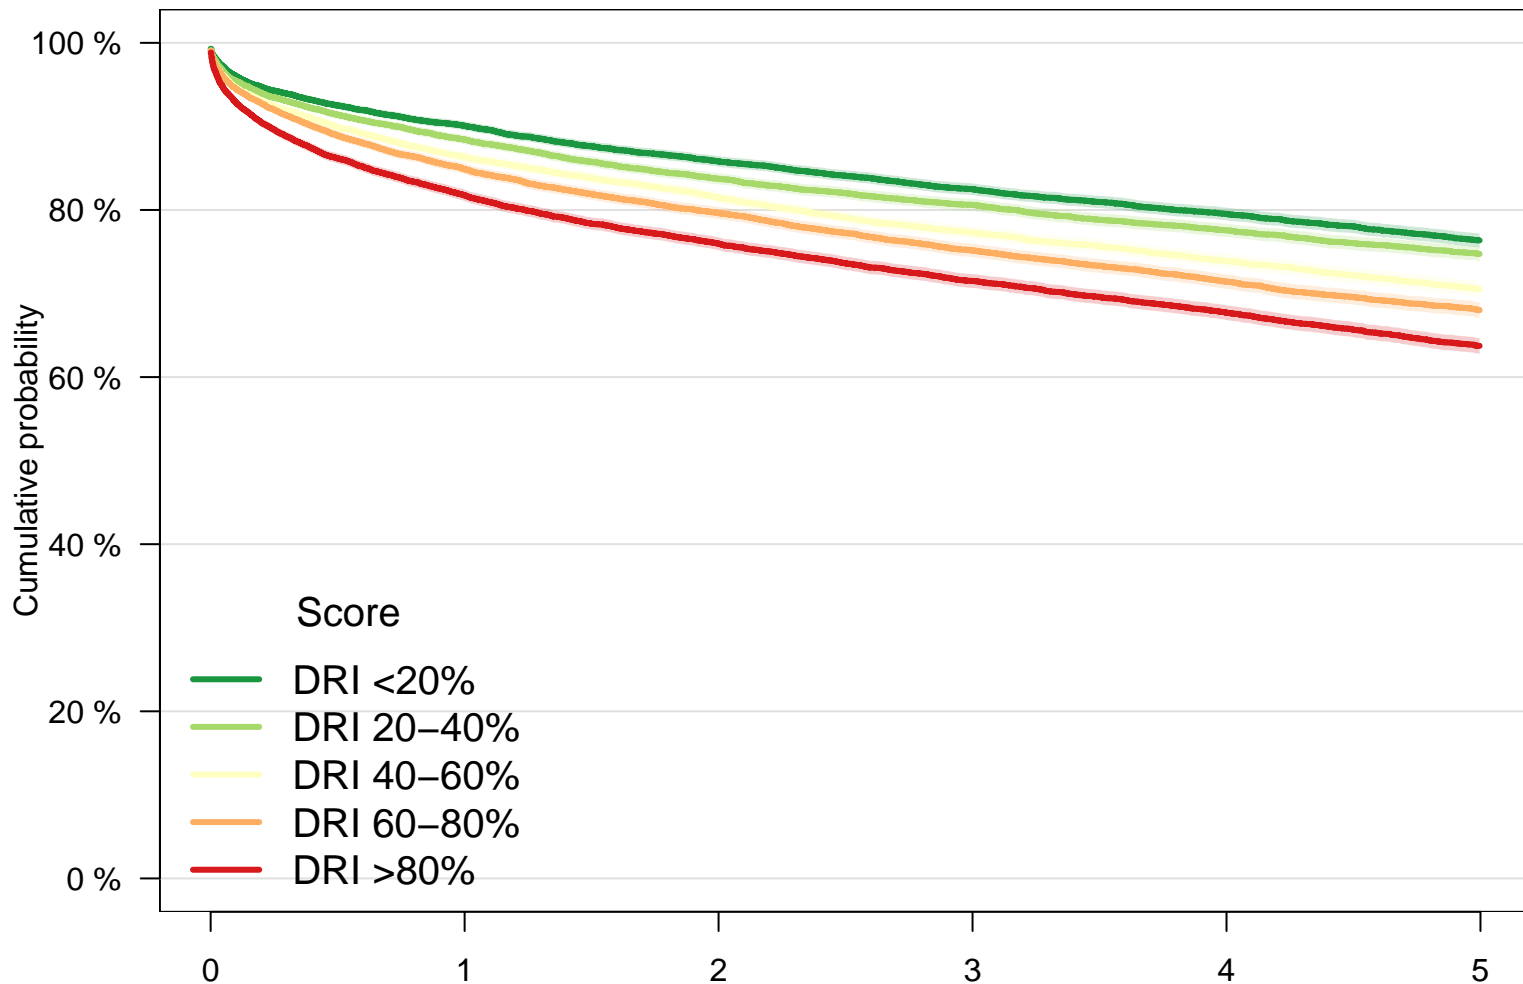

Score

- DRI <20%
- DRI 20–40%
- DRI 40–60%
- DRI 60–80%
- DRI >80%

| Score       | Survival period (years) |       |      |      |      |      |
|-------------|-------------------------|-------|------|------|------|------|
| DRI <20%:   | 12456                   | 10637 | 9018 | 7661 | 6421 | 5320 |
| DRI 20–40%: | 12463                   | 10320 | 8526 | 7171 | 5973 | 4943 |
| DRI 40–60%: | 12470                   | 10159 | 8376 | 6909 | 5698 | 4655 |
| DRI 60–80%: | 12447                   | 9992  | 8179 | 6716 | 5513 | 4557 |
| DRI >80%:   | 12458                   | 9699  | 7950 | 6559 | 5464 | 4462 |

**Fig S2B. Overall graft survival, sRRI**

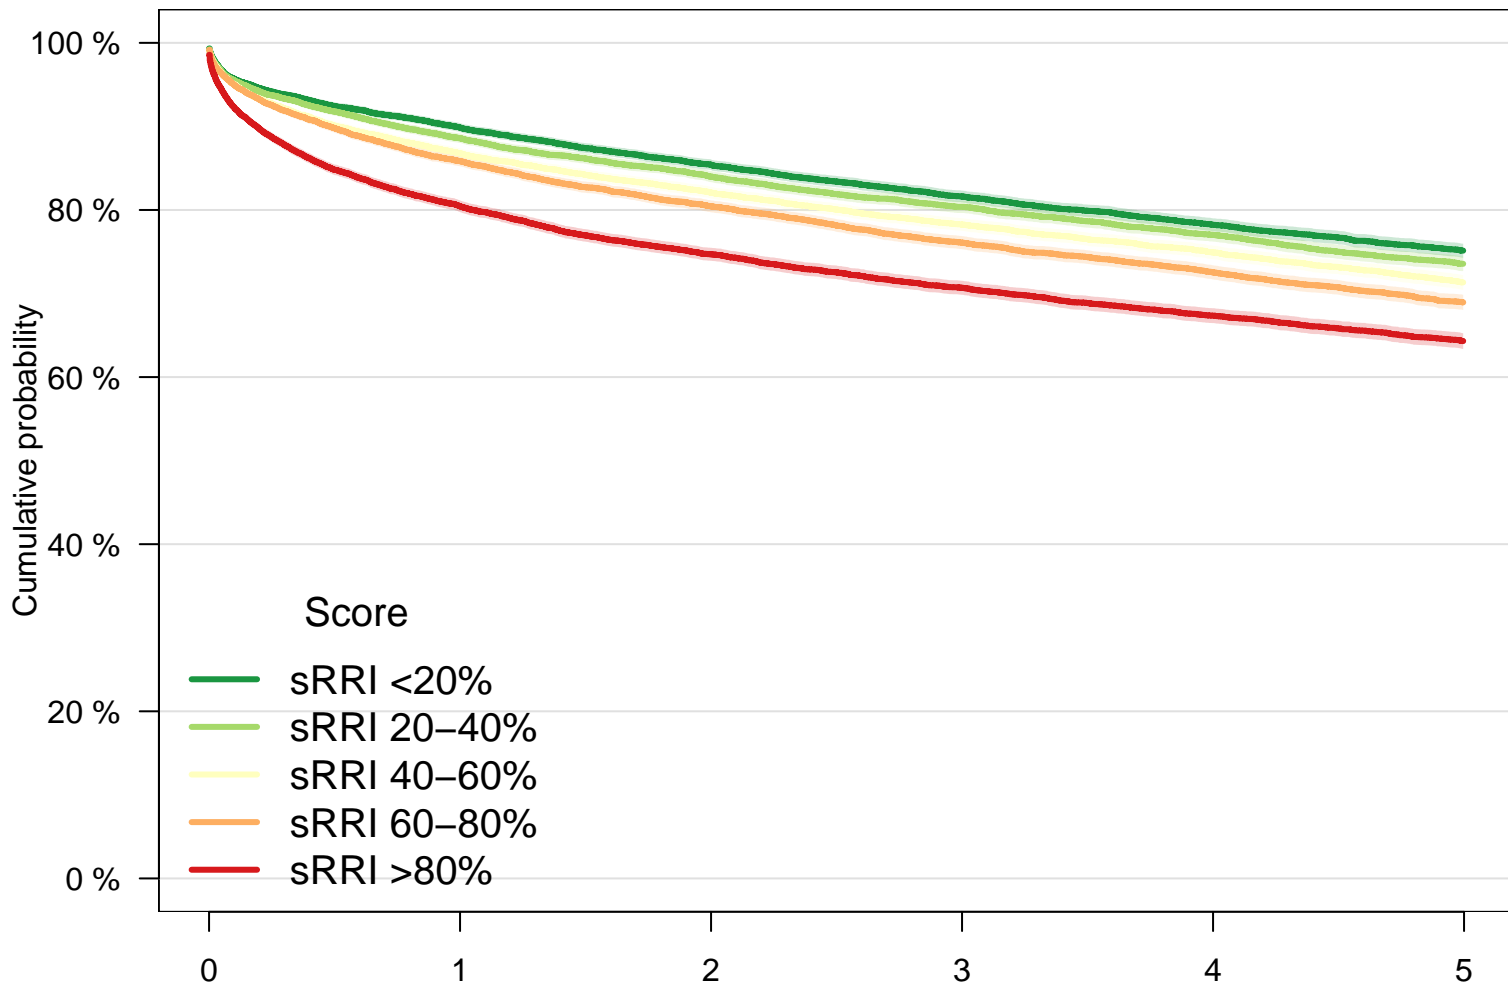

| Score        | Survival period (years) |       |      |      |      |      |
|--------------|-------------------------|-------|------|------|------|------|
| sRRI <20%:   | 12480                   | 10655 | 9107 | 7750 | 6512 | 5434 |
| sRRI 20-40%: | 12362                   | 10325 | 8567 | 7166 | 6015 | 5000 |
| sRRI 40-60%: | 12555                   | 10308 | 8561 | 7208 | 5999 | 4933 |
| sRRI 60-80%: | 12395                   | 10074 | 8326 | 6902 | 5710 | 4677 |
| sRRI >80%:   | 12502                   | 9445  | 7488 | 5990 | 4833 | 3893 |



**Fig S2C. Overall graft survival, ETDRI**

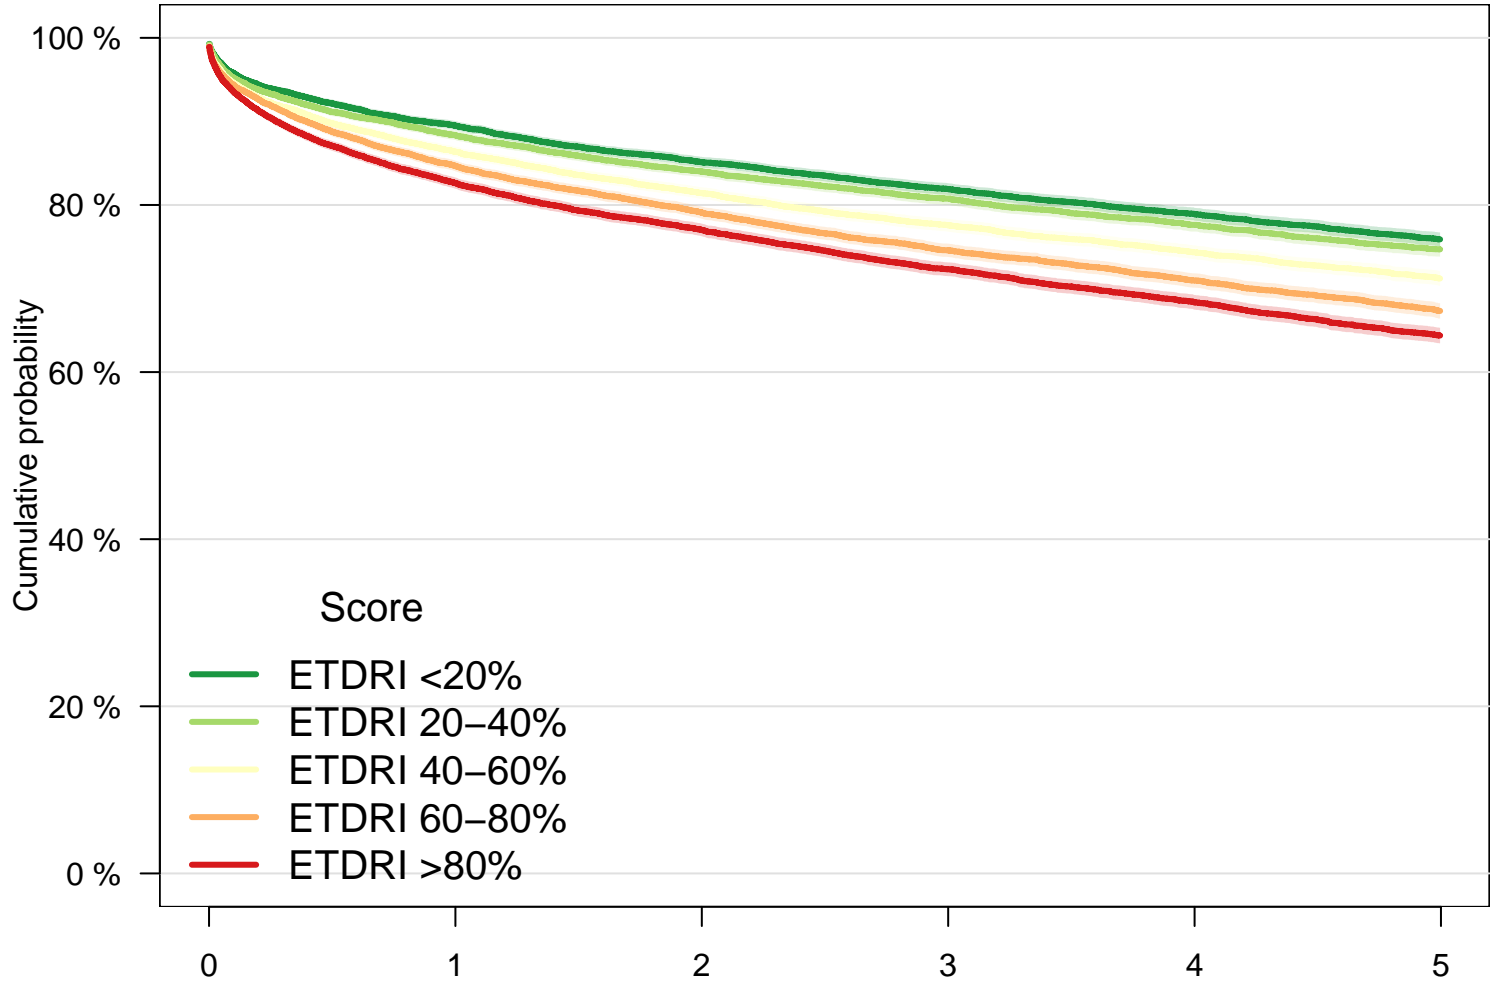

| Score         | Survival period (years) |       |      |      |      |      |
|---------------|-------------------------|-------|------|------|------|------|
| ETDRI <20%:   | 12457                   | 10588 | 9010 | 7688 | 6491 | 5394 |
| ETDRI 20-40%: | 12465                   | 10228 | 8303 | 6811 | 5594 | 4590 |
| ETDRI 40-60%: | 12450                   | 10182 | 8456 | 7105 | 5940 | 4922 |
| ETDRI 60-80%: | 12485                   | 10023 | 8216 | 6786 | 5536 | 4522 |
| ETDRI >80%:   | 12437                   | 9786  | 8064 | 6626 | 5508 | 4509 |

**Fig S2D. Overall graft survival, BAR**

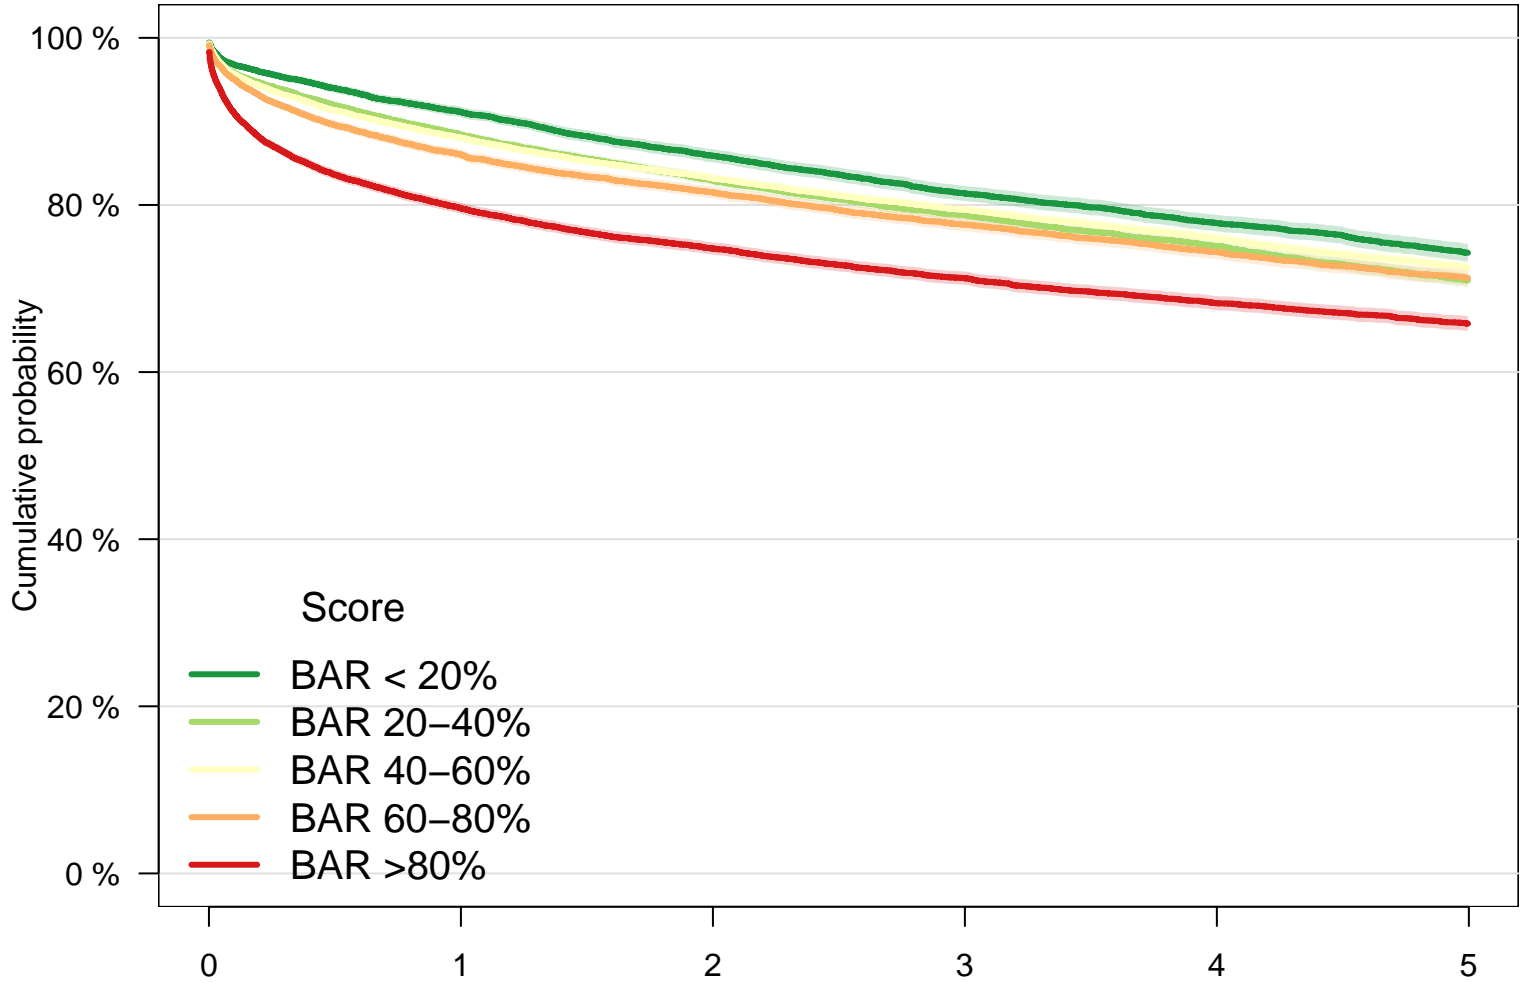

Score

- BAR < 20%
- BAR 20–40%
- BAR 40–60%
- BAR 60–80%
- BAR >80%

| Score       | Survival period (years) |       |       |      |      |      |
|-------------|-------------------------|-------|-------|------|------|------|
| BAR < 20%:  | 7999                    | 6901  | 5764  | 4832 | 4033 | 3319 |
| BAR 20–40%: | 14410                   | 11987 | 9820  | 8145 | 6731 | 5474 |
| BAR 40–60%: | 14586                   | 12267 | 10413 | 8954 | 7579 | 6401 |
| BAR 60–80%: | 11622                   | 9474  | 7953  | 6605 | 5483 | 4465 |
| BAR >80%:   | 13677                   | 10178 | 8099  | 6480 | 5243 | 4278 |

**Fig S2E. Overall graft survival, DMELD**

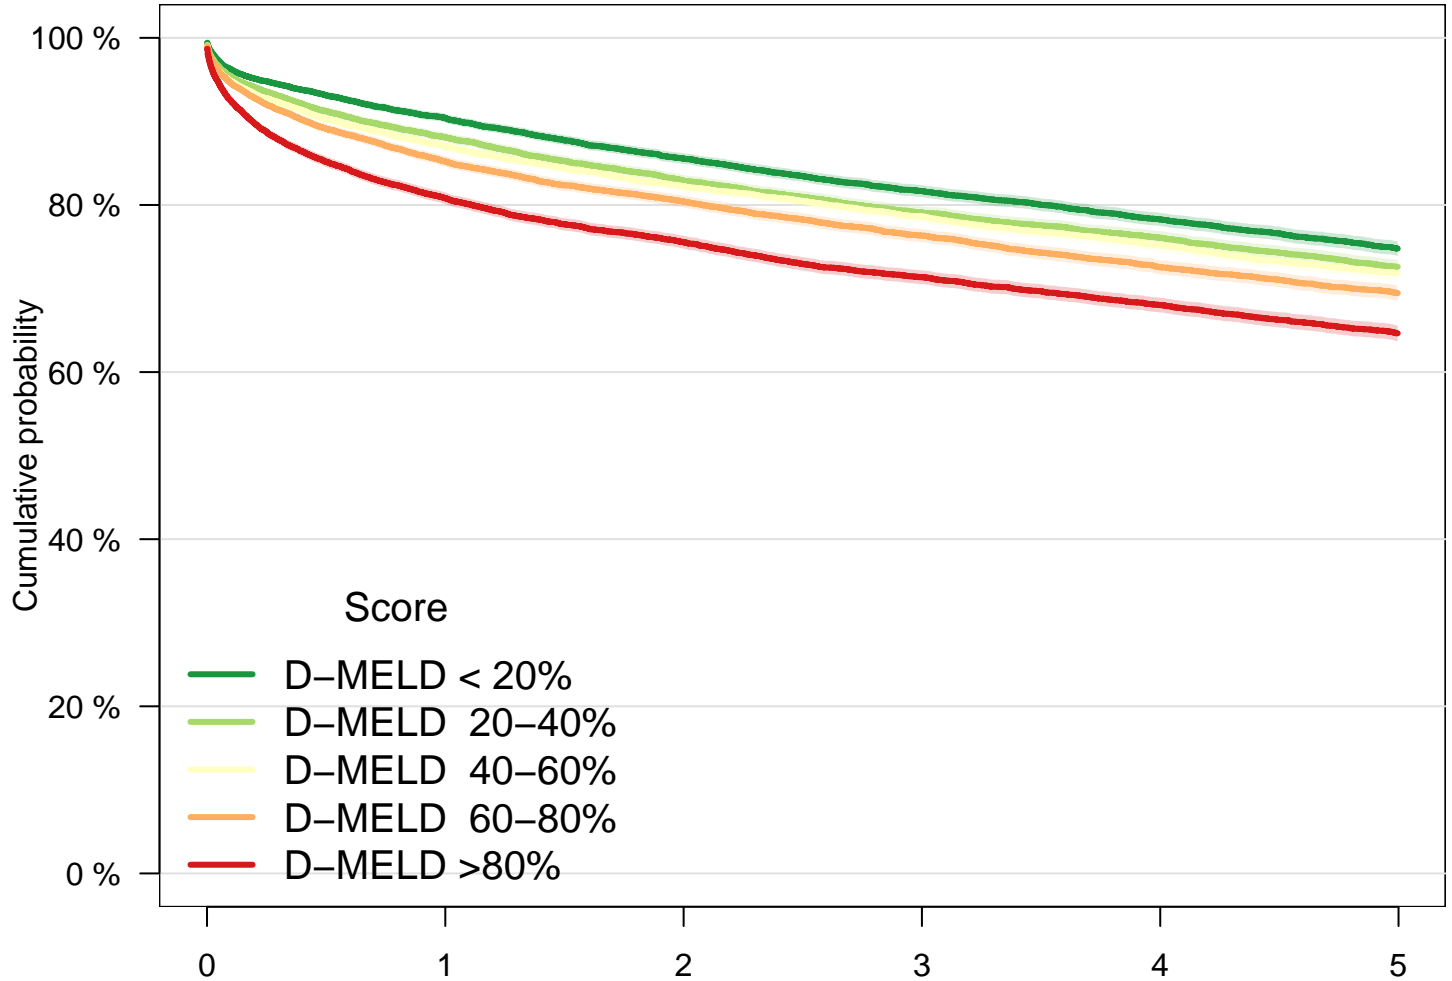

Score

- D-MELD < 20%
- D-MELD 20-40%
- D-MELD 40-60%
- D-MELD 60-80%
- D-MELD >80%

Score

Survival period (years)

|                |       |       |      |      |      |      |
|----------------|-------|-------|------|------|------|------|
| D-MELD < 20%:  | 12333 | 10501 | 8752 | 7341 | 6129 | 5071 |
| D-MELD 20-40%: | 12575 | 10479 | 8749 | 7447 | 6231 | 5144 |
| D-MELD 40-60%: | 12458 | 10258 | 8522 | 7128 | 5959 | 4942 |
| D-MELD 60-80%: | 12438 | 10035 | 8329 | 6901 | 5717 | 4728 |
| D-MELD >80%:   | 12490 | 9534  | 7697 | 6199 | 5033 | 4052 |

**Fig S3A. Death censored graft failure, sRRI**

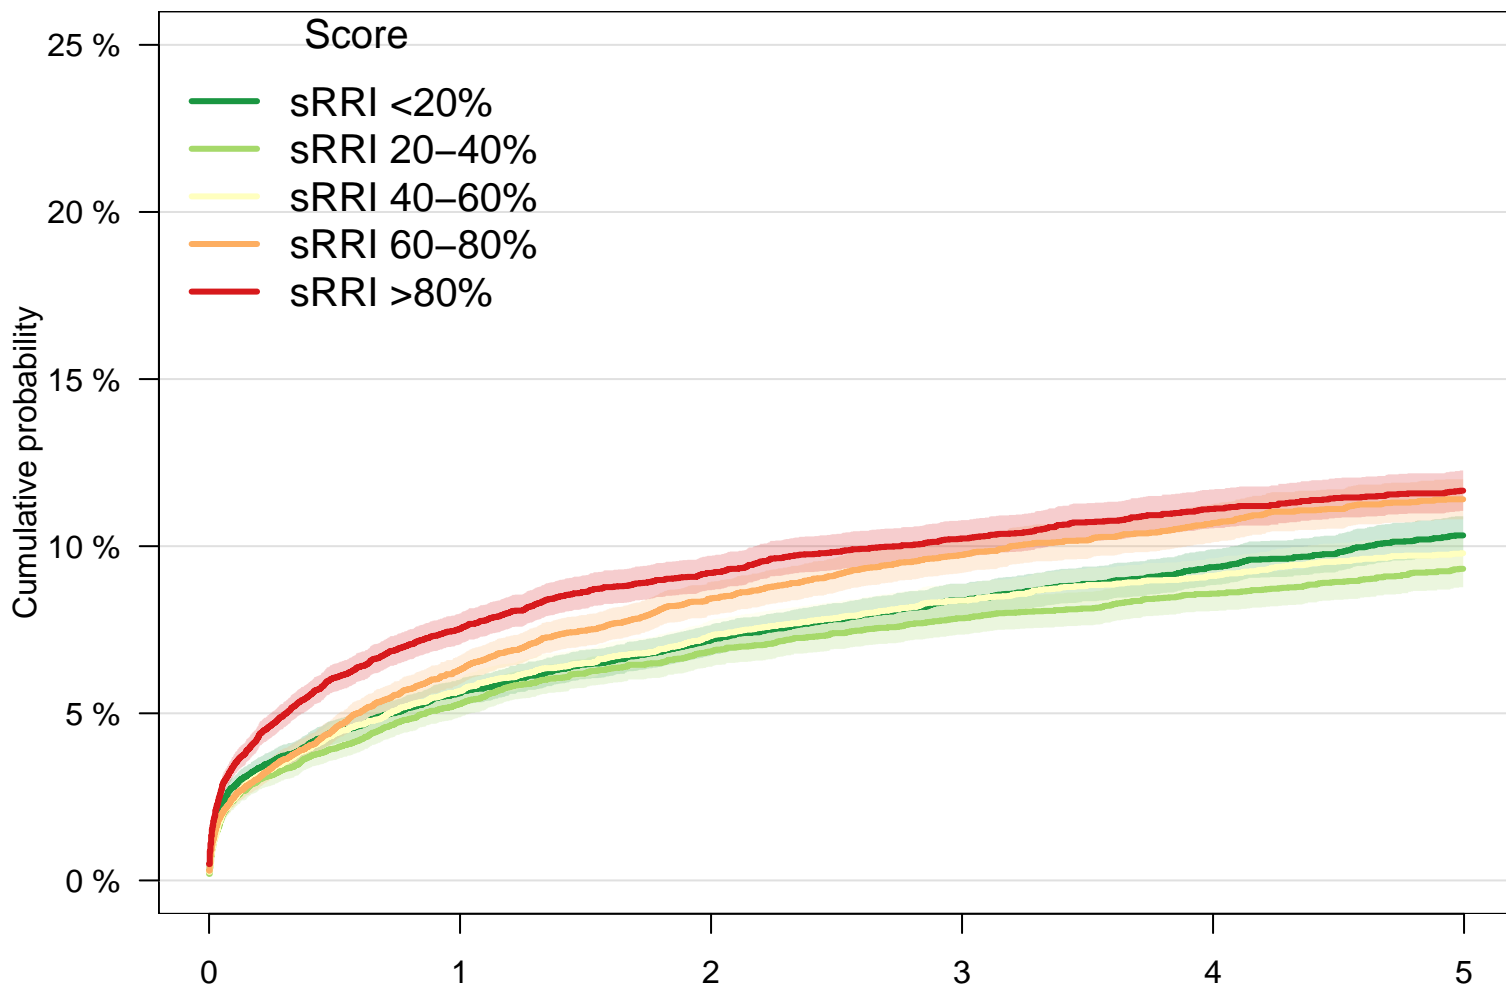

| Score        | Survival period (years) |       |      |      |      |      |
|--------------|-------------------------|-------|------|------|------|------|
| sRRI <20%:   | 12480                   | 10655 | 9107 | 7750 | 6512 | 5434 |
| sRRI 20–40%: | 12362                   | 10325 | 8567 | 7166 | 6015 | 5000 |
| sRRI 40–60%: | 12555                   | 10308 | 8561 | 7208 | 5999 | 4933 |
| sRRI 60–80%: | 12395                   | 10074 | 8326 | 6902 | 5710 | 4677 |
| sRRI >80%:   | 12502                   | 9445  | 7488 | 5990 | 4833 | 3893 |

**Fig S3B. Death censored graft failure, DRM**

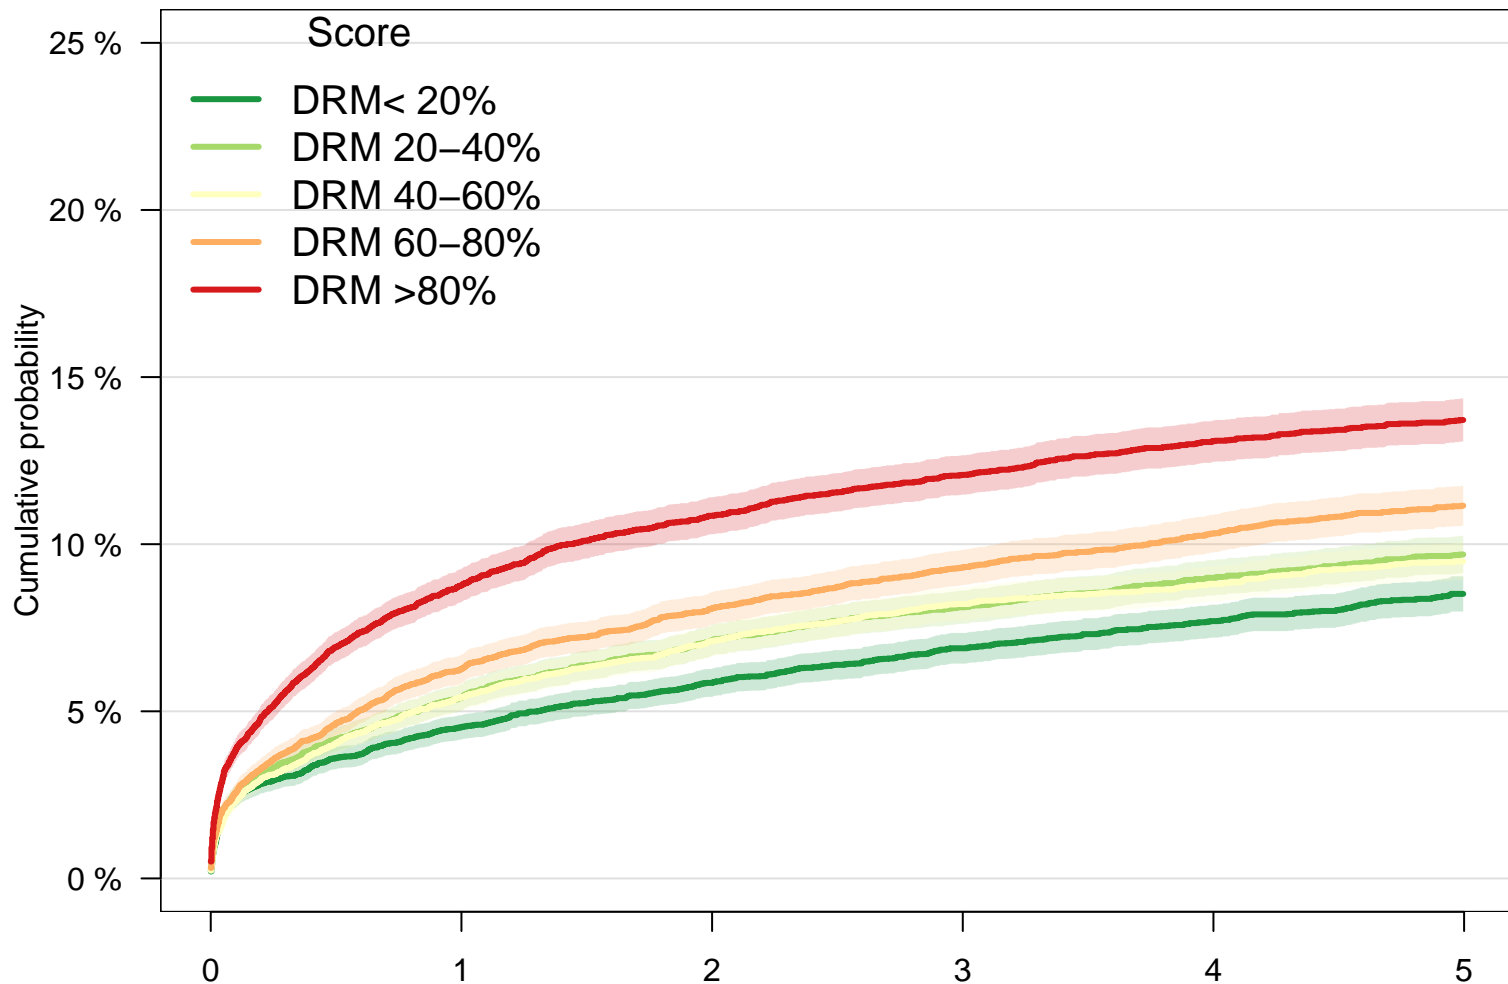

| Score       | Survival period (years) |       |      |      |      |      |
|-------------|-------------------------|-------|------|------|------|------|
| DRM < 20%:  | 12458                   | 10722 | 9178 | 7838 | 6639 | 5585 |
| DRM 20-40%: | 12461                   | 10390 | 8635 | 7268 | 6030 | 4984 |
| DRM 40-60%: | 12457                   | 10330 | 8574 | 7131 | 5954 | 4897 |
| DRM 60-80%: | 12458                   | 10091 | 8254 | 6824 | 5583 | 4540 |
| DRM > 80%:  | 12460                   | 9274  | 7408 | 5955 | 4863 | 3931 |

**Fig S3C. Death censored graft failure, SOFT**

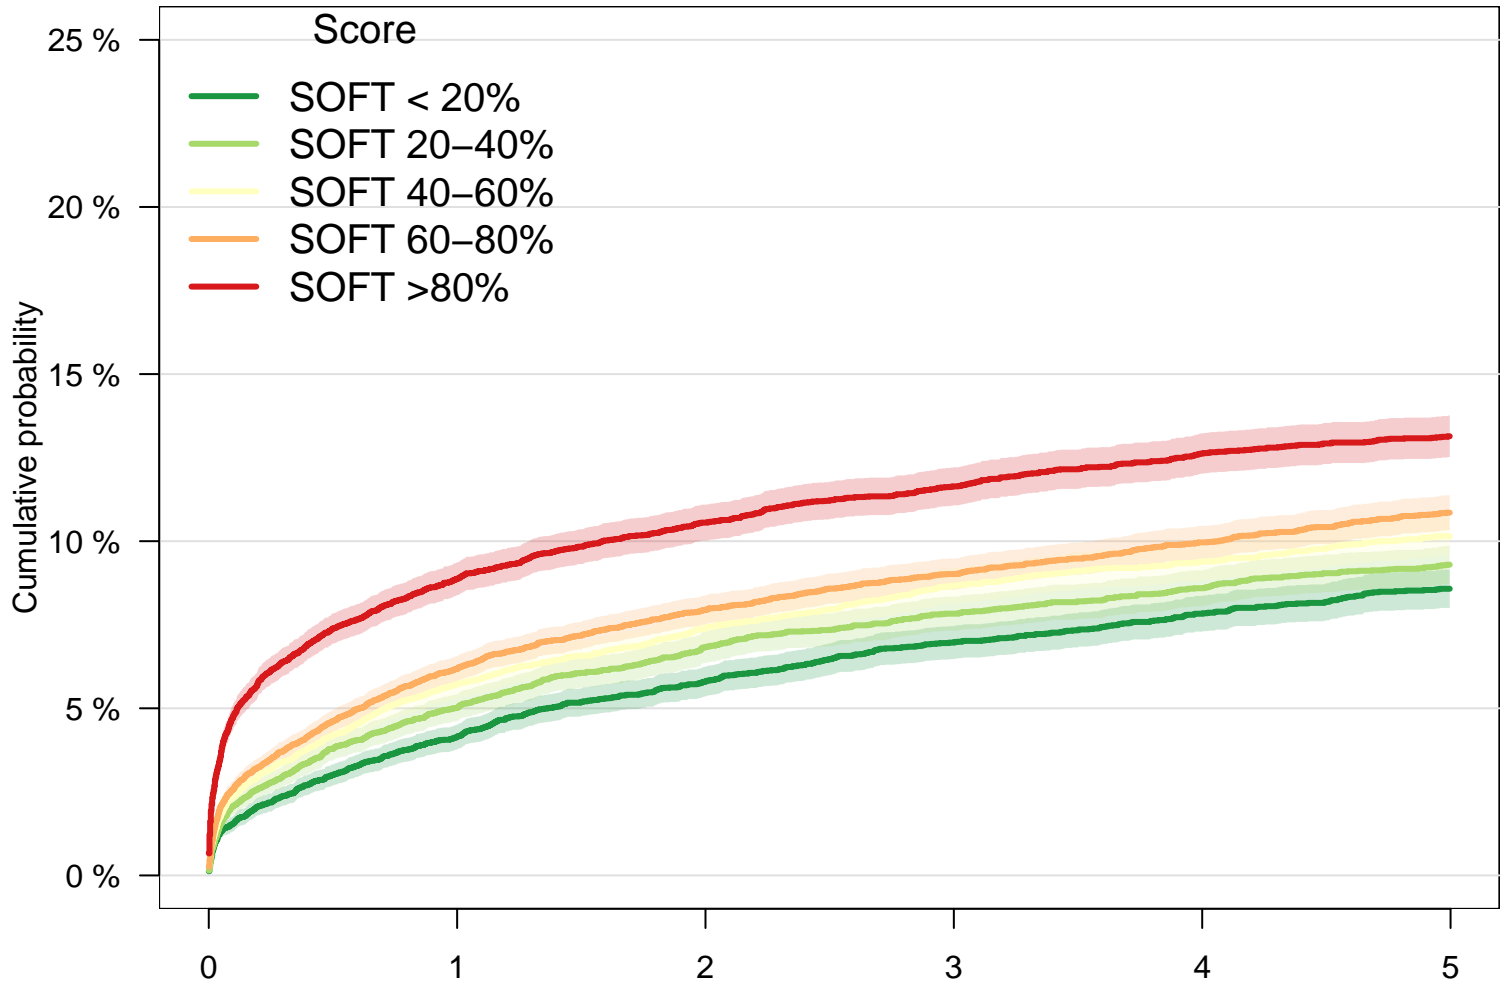

| Score        | Survival period (years) |       |       |      |      |      |
|--------------|-------------------------|-------|-------|------|------|------|
| SOFT < 20%:  | 11149                   | 9559  | 7806  | 6408 | 5173 | 4139 |
| SOFT 20-40%: | 11378                   | 9659  | 8084  | 6838 | 5760 | 4744 |
| SOFT 40-60%: | 11386                   | 9570  | 8018  | 6804 | 5691 | 4760 |
| SOFT 60-80%: | 15496                   | 12701 | 10645 | 8914 | 7456 | 6190 |
| SOFT >80%:   | 12885                   | 9318  | 7496  | 6052 | 4989 | 4104 |

**Fig S3D. Death censored graft failure, BAR**

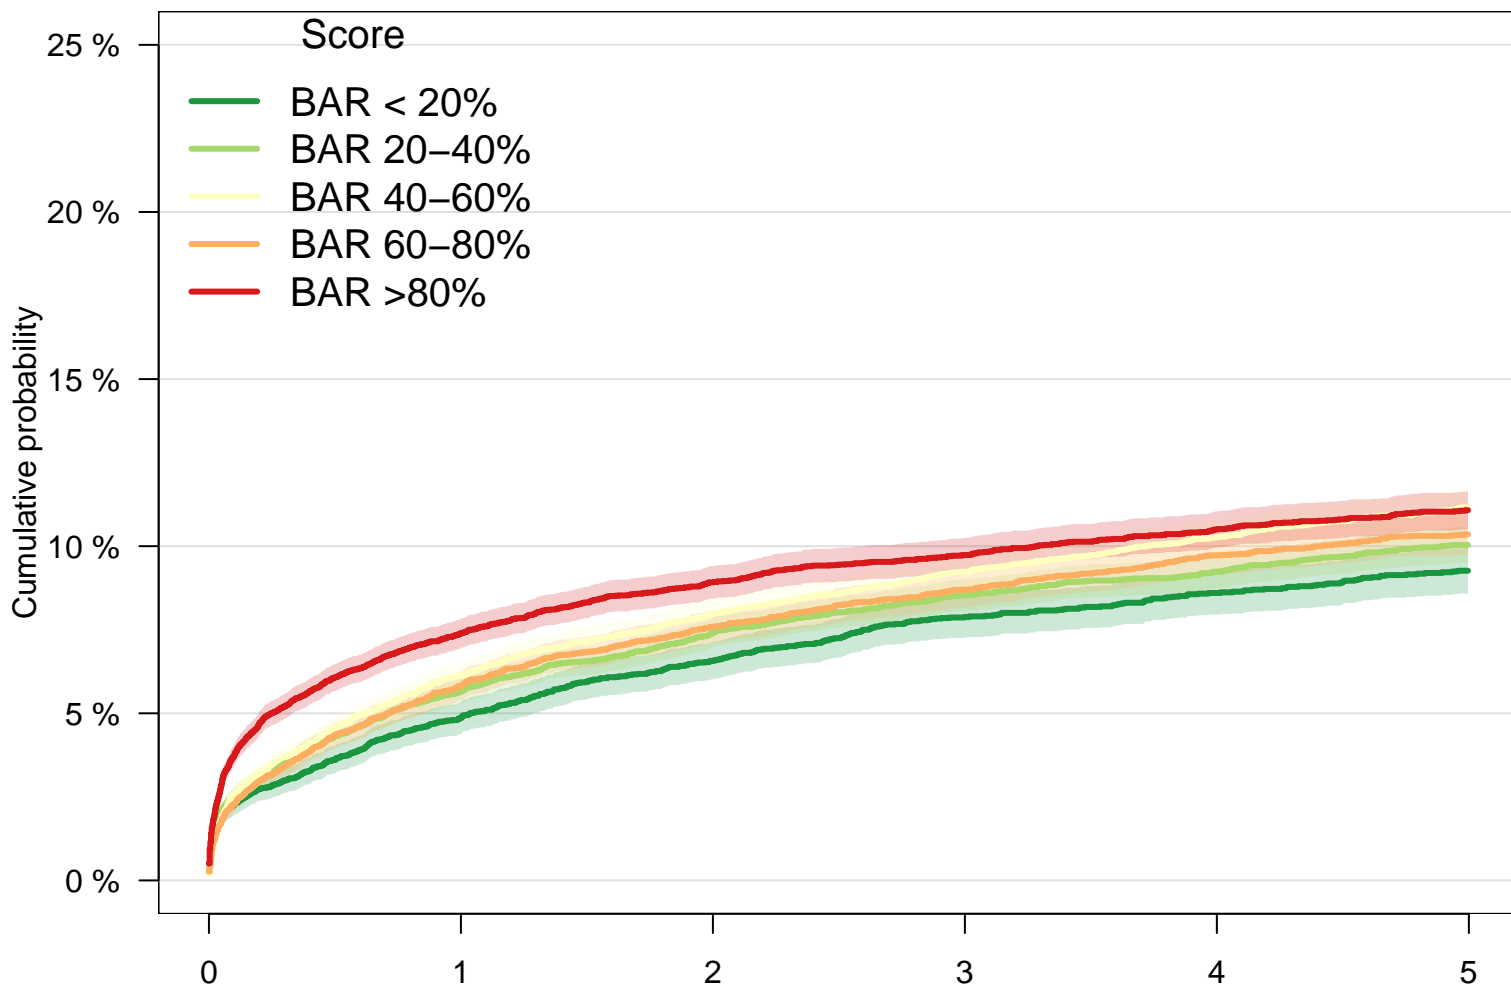

| Score       | Survival period (years) | 0     | 1     | 2    | 3    | 4    | 5 |
|-------------|-------------------------|-------|-------|------|------|------|---|
| BAR < 20%:  | 7999                    | 6901  | 5764  | 4832 | 4033 | 3319 |   |
| BAR 20–40%: | 14410                   | 11987 | 9820  | 8145 | 6731 | 5474 |   |
| BAR 40–60%: | 14586                   | 12267 | 10413 | 8954 | 7579 | 6401 |   |
| BAR 60–80%: | 11622                   | 9474  | 7953  | 6605 | 5483 | 4465 |   |
| BAR >80%:   | 13677                   | 10178 | 8099  | 6480 | 5243 | 4278 |   |

**Fig S3E. Death censored graft failure, DMELD**

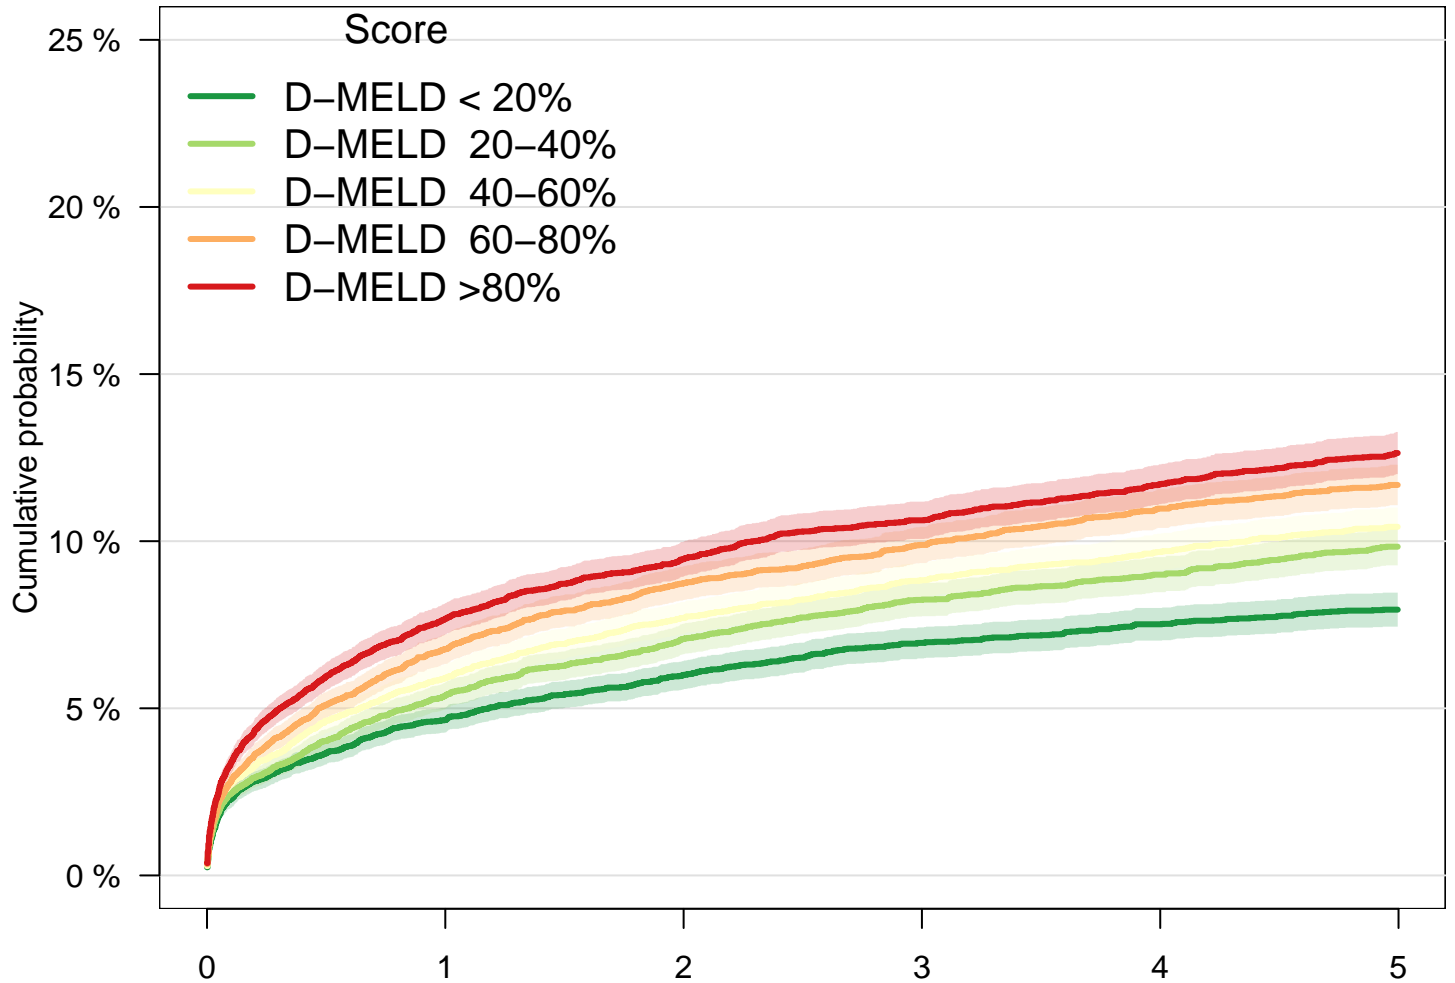

| Score          | Survival period (years) | 0     | 1    | 2    | 3    | 4    | 5 |
|----------------|-------------------------|-------|------|------|------|------|---|
| D-MELD < 20%:  | 12333                   | 10501 | 8752 | 7341 | 6129 | 5071 |   |
| D-MELD 20-40%: | 12575                   | 10479 | 8749 | 7447 | 6231 | 5144 |   |
| D-MELD 40-60%: | 12458                   | 10258 | 8522 | 7128 | 5959 | 4942 |   |
| D-MELD 60-80%: | 12438                   | 10035 | 8329 | 6901 | 5717 | 4728 |   |
| D-MELD > 80%:  | 12490                   | 9534  | 7697 | 6199 | 5033 | 4052 |   |
